# Supplementary material for: Geographical Variation in Body Size and the Bergmann’s Rule in Andrew’s Toad (Bufo andrewsi)
Source: MDPI journal article supplement (doi:10.3390/biology11121766), 2022-12-06
Supplement: s1 [file s1]

## **Geographical Variation in Body Size and the Bergman's Rule in Andrew's Toad (*Bufo andrewsi*)**

Ying Jiang <sup>1,2,3</sup>, Li Zhao <sup>2,3</sup>, Xiaofeng Luan <sup>1,\*</sup> and Wenbo Liao <sup>2,3,\*</sup>

<sup>1</sup>School of Ecology and Nature Conservation, Beijing Forestry University, Beijing 100083, China

<sup>2</sup>Key Laboratory of Southwest China Wildlife Resources Conservation (Ministry of Education), China West Normal University, Nanchong 637009, China

<sup>3</sup>Key Laboratory of Artificial Propagation and Utilization in Anurans of Nanchong City, China West Normal University, Nanchong 637009, China

\*Correspondence: luanxiaofeng@bjfu.edu.cn (X.L.); liaobo\_0\_0@126.com (W.L.)

Table S1. Descriptive information about the study sites of Andrew's toad (*B. andrewsi*), together with mean ( $\pm$  SD) body size and age characteristics of males and females.

| Study sites | Longitude<br>(E) | Latitude<br>(N) | Altitude<br>(m) | Females<br>SVL (mm)              | Males<br>SVL (mm)                | Females<br>mean<br>age<br>(years) | Males<br>mean<br>age<br>(years) | Females<br>age at<br>sexual<br>maturity<br>(years) | Males<br>age at<br>sexual<br>maturity<br>(years) | Females<br>longevity<br>(years) | Males<br>longevity<br>(years) | Source              |
|-------------|------------------|-----------------|-----------------|----------------------------------|----------------------------------|-----------------------------------|---------------------------------|----------------------------------------------------|--------------------------------------------------|---------------------------------|-------------------------------|---------------------|
| Gengda      | 103.31           | 31.08           | 1524            | 87.5 $\pm$ 10.8<br><i>n</i> = 10 | 67.3 $\pm$ 5.6<br><i>n</i> = 30  | 2.9 $\pm$ 0.9<br><i>n</i> = 10    | 1.9 $\pm$ 0.6<br><i>n</i> = 30  | 2                                                  | 1                                                | 4                               | 3                             | unpublished<br>data |
| Anning      | 102.15           | 27.95           | 1522            | 73.1 $\pm$ 8.1<br><i>n</i> = 5   | 66.8 $\pm$ 8.1<br><i>n</i> = 23  | 2.4 $\pm$ 0.5<br><i>n</i> = 5     | 2 $\pm$ 0.6<br><i>n</i> = 23    | 2                                                  | 1                                                | 3                               | 3                             | unpublished<br>data |
| Gucheng     | 100.28           | 26.83           | 2367            | 101.7 $\pm$ 11.0<br><i>n</i> = 4 | 79.6 $\pm$ 8.6<br><i>n</i> = 26  | 3.0 $\pm$ 1.0<br><i>n</i> = 4     | 2.7 $\pm$ 0.9<br><i>n</i> = 26  | 2                                                  | 1                                                | 4                               | 4                             | unpublished<br>data |
| Hanyuan     | 102.64           | 29.35           | 864             | 75.6 $\pm$ 11.4<br><i>n</i> = 8  | 64.2 $\pm$ 11.1<br><i>n</i> = 26 | 2.8 $\pm$ 1.1<br><i>n</i> = 8     | 2.3 $\pm$ 1.1<br><i>n</i> = 26  | 2                                                  | 1                                                | 4                               | 3                             | unpublished<br>data |
| Jinchuan    | 102.04           | 31.3            | 2078            | 77.0 $\pm$ 4.9<br><i>n</i> = 5   | 72.9 $\pm$ 4.4<br><i>n</i> = 26  | 2.2 $\pm$ 0.7<br><i>n</i> = 5     | 2.3 $\pm$ 0.6<br><i>n</i> = 26  | 2                                                  | 2                                                | 3                               | 4                             | unpublished<br>data |
| Jiulong     | 101.5            | 29.01           | 2902            | 82.5 $\pm$ 8.2<br><i>n</i> = 11  | 67.8 $\pm$ 6.0<br><i>n</i> = 16  | 3.1 $\pm$ 0.7<br><i>n</i> = 11    | 2.7 $\pm$ 0.7<br><i>n</i> = 16  | 2                                                  | 2                                                | 4                               | 4                             | unpublished<br>data |
| Luding      | 102.21           | 29.9            | 1477            | 73.2 $\pm$ 7.9<br><i>n</i> = 4   | 68 $\pm$ 8.0<br><i>n</i> = 21    | 3.3 $\pm$ 1.0<br><i>n</i> = 4     | 2.2 $\pm$ 1.0<br><i>n</i> = 21  | 3                                                  | 1                                                | 4                               | 5                             | unpublished<br>data |
| Lamasi      | 103.18           | 31.03           | 1961            | 89.3 $\pm$ 7.1<br><i>n</i> = 13  | 70.6 $\pm$ 4.3<br><i>n</i> = 25  | 3 $\pm$ 1.1<br><i>n</i> = 13      | 2.3 $\pm$ 0.7<br><i>n</i> = 25  | 1                                                  | 1                                                | 5                               | 4                             | unpublished<br>data |
| Maoxian     | 103.84           | 31.67           | 1553            | 85.4 $\pm$ 7.2<br><i>n</i> = 11  | 75.9 $\pm$ 7.3<br><i>n</i> = 19  | 2.3 $\pm$ 0.7<br><i>n</i> = 11    | 2.6 $\pm$ 0.8<br><i>n</i> = 19  | 2                                                  | 2                                                | 4                               | 4                             | unpublished<br>data |

|            |        |       |      |                              |                             |                            |                            |   |   |    |   |                     |
|------------|--------|-------|------|------------------------------|-----------------------------|----------------------------|----------------------------|---|---|----|---|---------------------|
| Puxiong    | 102.65 | 28.52 | 1864 | $93.0 \pm 10.5$<br>$n = 5$   | $70.6 \pm 8.9$<br>$n = 8$   | $1.8 \pm 0.7$<br>$n = 5$   | $2.4 \pm 0.7$<br>$n = 8$   | 1 | 1 | 3  | 3 | unpublished<br>data |
| Shiziba    | 106.55 | 32.66 | 1651 | $104.8 \pm 14.9$<br>$n = 10$ | $76.9 \pm 14.3$<br>$n = 26$ | $3.7 \pm 1.3$<br>$n = 10$  | $2.6 \pm 1.3$<br>$n = 26$  | 3 | 1 | 5  | 5 | unpublished<br>data |
| Taiping    | 102.47 | 26.74 | 1916 | $92.1 \pm 11.5$<br>$n = 9$   | $70.1 \pm 10.0$<br>$n = 22$ | $2.3 \pm 0.6$<br>$n = 9$   | $2.6 \pm 0.6$<br>$n = 22$  | 2 | 2 | 3  | 4 | unpublished<br>data |
| Xunyangba  | 108.52 | 33.56 | 1393 | $79.0 \pm 7.5$<br>$n = 4$    | $63.7 \pm 6.6$<br>$n = 28$  | $6.3 \pm 1.7$<br>$n = 4$   | $3.9 \pm 1.6$<br>$n = 28$  | 4 | 2 | 9  | 6 | unpublished<br>data |
| Yinchangou | 103.12 | 30.97 | 2153 | $92.6 \pm 10.7$<br>$n = 4$   | $74.4 \pm 4.4$<br>$n = 13$  | $4.3 \pm 0.5$<br>$n = 4$   | $3.2 \pm 0.6$<br>$n = 13$  | 4 | 2 | 5  | 4 | unpublished<br>data |
| Lingguan   | 102.9  | 30.3  | 760  | $94.2 \pm 5.2$<br>$n = 32$   | $72.9 \pm 3.8$<br>$n = 47$  | $3.3 \pm 0.9$<br>$n = 32$  | $2.0 \pm 0.8$<br>$n = 47$  | 2 | 1 | 5  | 4 | Liao et al.<br>2015 |
| Muping     | 102.83 | 30.35 | 1000 | $97.3 \pm 4.3$<br>$n = 26$   | $74.1 \pm 4.3$<br>$n = 45$  | $3.6 \pm 1.0$<br>$n = 26$  | $2.1 \pm 0.7$<br>$n = 44$  | 2 | 1 | 6  | 4 | Liao et al.<br>2015 |
| Yanjing    | 102.92 | 30.53 | 1390 | $98.8 \pm 4.9$<br>$n = 8$    | $78.2 \pm 3.8$<br>$n = 18$  | $4.1 \pm 0.9$<br>$n = 7$   | $2.7 \pm 0.7$<br>$n = 15$  | 3 | 2 | 5  | 4 | Liao et al.<br>2015 |
| Dengcigou  | 102.93 | 30.55 | 1690 | $99.7 \pm 4.9$<br>$n = 192$  | $79.9 \pm 4.5$<br>$n = 361$ | $4.2 \pm 1.1$<br>$n = 120$ | $2.2 \pm 0.9$<br>$n = 229$ | 3 | 2 | 7  | 6 | Liao et al.<br>2015 |
| Zhalangou  | 102.93 | 30.57 | 1800 | $101.0 \pm 3.8$<br>$n = 9$   | $80.2 \pm 4.2$<br>$n = 29$  | $4.3 \pm 1.4$<br>$n = 9$   | $3.3 \pm 1.0$<br>$n = 11$  | 3 | 2 | 7  | 5 | Liao et al.<br>2015 |
| Church     | 102.95 | 30.53 | 2100 | $103.2 \pm 4.4$<br>$n = 22$  | $82.6 \pm 3.4$<br>$n = 30$  | $5.2 \pm 1.2$<br>$n = 22$  | $4.1 \pm 0.9$<br>$n = 22$  | 3 | 3 | 8  | 6 | Liao et al.<br>2015 |
| Yaoji      | 102.72 | 30.68 | 2387 | $87.5 \pm 5.9$<br>$n = 7$    | $74.3 \pm 6.1$<br>$n = 17$  | $3.7 \pm 0.8$<br>$n = 7$   | $4.1 \pm 0.1$<br>$n = 15$  | 3 | 3 | 10 | 9 | Liao et al.<br>2015 |
| Muli       | 101.70 | 28.87 | 1710 | $84.9 \pm 1.3$<br>$n = 5$    | $69.0 \pm 6.0$<br>$n = 12$  | $4.2 \pm 1.1$<br>$n = 5$   | $3.4 \pm 1.1$<br>$n = 12$  | 3 | 2 | 6  | 5 | Liao et al.<br>2015 |

|                 |        |       |      |                            |                             |                           |                            |   |   |    |    |                     |
|-----------------|--------|-------|------|----------------------------|-----------------------------|---------------------------|----------------------------|---|---|----|----|---------------------|
| Xingguqin       | 99.37  | 27.65 | 2768 | $97.4 \pm 5.6$<br>$n = 15$ | $76.0 \pm 7.5$<br>$n = 203$ | $7 \pm 2.3$<br>$n = 14$   | $4.7 \pm 2.3$<br>$n = 197$ | 3 | 1 | 12 | 11 | Liao et al.<br>2015 |
| Qibie           | 99.47  | 27.57 | 2028 | $96.8 \pm 7.4$<br>$n = 27$ | $73.7 \pm 7.9$<br>$n = 167$ | $5.6 \pm 1.9$<br>$n = 27$ | $3.7 \pm 1.3$<br>$n = 167$ | 3 | 1 | 10 | 9  | Liao et al.<br>2015 |
| Kegong          | 99.32  | 27.55 | 2422 | $95.9 \pm 7.8$<br>$n = 17$ | $74.8 \pm 5.4$<br>$n = 67$  | $6.2 \pm 1.2$<br>$n = 17$ | $4.1 \pm 1.3$<br>$n = 65$  | 3 | 2 | 7  | 7  | Liao et al.<br>2015 |
| Kegong          | 99.30  | 27.55 | 2328 | $89.8 \pm 4.4$<br>$n = 4$  | $74.6 \pm 6.4$<br>$n = 110$ | $7.6 \pm 1.7$<br>$n = 4$  | $4.4 \pm 1.7$<br>$n = 110$ | 3 | 2 | 10 | 9  | Liao et al.<br>2015 |
| Pantiange       | 99.22  | 27.33 | 2520 | $91.9 \pm 9.7$<br>$n = 13$ | $72.6 \pm 4.8$<br>$n = 75$  | $4.5 \pm 1$<br>$n = 13$   | $3.6 \pm 1.3$<br>$n = 75$  | 4 | 1 | 5  | 8  | Liao et al.<br>2015 |
| Caopuo          | 103.32 | 31.32 | 2120 | $67.9 \pm 8.9$<br>$n = 9$  | $62.2 \pm 5.9$<br>$n = 35$  | $4.0 \pm 1.7$<br>$n = 7$  | $6.7 \pm 2.1$<br>$n = 25$  | 5 | 2 | 11 | 9  | Liao et al.<br>2015 |
| Yele            | 102.20 | 28.92 | 2554 | $74.6 \pm 4.0$<br>$n = 43$ | $62.5 \pm 3.6$<br>$n = 63$  | $4.6 \pm 0.8$<br>$n = 43$ | $3.1 \pm 1.1$<br>$n = 63$  | 3 | 2 | 6  | 5  | Liao et al.<br>2015 |
| Baozigou        | 104.15 | 32.9  | 2452 | $90.0 \pm 5.7$<br>$n = 18$ | $70.6 \pm 5.5$<br>$n = 28$  | $8.3 \pm 1.3$<br>$n = 18$ | $5.8 \pm 1.4$<br>$n = 28$  | 6 | 3 | 11 | 8  | Liao et al.<br>2015 |
| Muyangcha<br>ng | 104.10 | 32.97 | 2640 | $91.9 \pm 7.9$<br>$n = 27$ | $74.8 \pm 5.5$<br>$n = 47$  | $8.4 \pm 1.8$<br>$n = 27$ | $6.2 \pm 1.8$<br>$n = 47$  | 4 | 3 | 11 | 11 | Liao et al.<br>2015 |

Table S2. Environmental variables compiled to depict environment gradients for Andrew's toad (*B. andrewsi*).

| Study sites | Annual Mean<br>Temperature (°C) | Temperature<br>Seasonality | Annual<br>Precipitation (mm) | Precipitation of<br>Driest Month (mm) | Precipitation<br>Seasonality | UV-B<br>Seasonality | Mean UV-B of<br>Lowest Month |
|-------------|---------------------------------|----------------------------|------------------------------|---------------------------------------|------------------------------|---------------------|------------------------------|
| Gengda      | 11.471                          | 686.730                    | 899                          | 7                                     | 83.769                       | 105461              | 1269                         |
| Anning      | 16.892                          | 497.813                    | 946                          | 5                                     | 100.332                      | 137117              | 2134                         |
| Gucheng     | 13.600                          | 469.453                    | 796                          | 11                                    | 62.191                       | 223572              | 2801                         |
| Hanyuan     | 16.596                          | 610.769                    | 1214                         | 13                                    | 95.051                       | 139374              | 1541                         |
| Jinchuan    | 12.454                          | 633.807                    | 630                          | 2                                     | 87.800                       | 241349              | 2004                         |
| Jiulong     | 9.171                           | 534.128                    | 888                          | 2                                     | 98.672                       | 244765              | 2581                         |
| Luding      | 14.058                          | 610.956                    | 991                          | 6                                     | 93.293                       | 138801              | 1763                         |
| Lamasi      | 10.058                          | 646.659                    | 837                          | 6                                     | 80.047                       | 175943              | 1774                         |
| Maoxian     | 11.713                          | 694.164                    | 821                          | 3                                     | 87.365                       | 108096              | 1353                         |
| Puxiong     | 12.625                          | 552.266                    | 950                          | 8                                     | 92.228                       | 129969              | 1831                         |
| Shiziba     | 9.288                           | 756.719                    | 919                          | 8                                     | 76.739                       | 131824              | 1008                         |
| Taiping     | 14.600                          | 472.546                    | 954                          | 8                                     | 96.214                       | 137847              | 2204                         |
| Xunyangba   | 8.708                           | 801.135                    | 803                          | 7                                     | 71.096                       | 132526              | 1109                         |
| Yinchangou  | 9.046                           | 646.700                    | 787                          | 5                                     | 79.754                       | 139957              | 1580                         |
| Lingguan    | 14.563                          | 685.569                    | 1244                         | 15                                    | 89.496                       | 121027              | 1208                         |
| Muping      | 9.325                           | 658.074                    | 856                          | 12                                    | 78.157                       | 121027              | 1208                         |
| Yanjing     | 12.163                          | 678.213                    | 982                          | 10                                    | 83.386                       | 212128              | 1922                         |
| Dengcigou   | 10.525                          | 665.564                    | 869                          | 10                                    | 78.696                       | 212128              | 1922                         |
| Zhalangou   | 10.500                          | 663.232                    | 874                          | 11                                    | 78.332                       | 212128              | 1922                         |
| Church      | 9.167                           | 660.968                    | 836                          | 11                                    | 77.954                       | 212128              | 1922                         |
| Yaoji       | 8.850                           | 632.100                    | 744                          | 6                                     | 81.661                       | 231203              | 2092                         |
| Muli        | 0.754                           | 545.533                    | 843                          | 4                                     | 92.031                       | 243921              | 2597                         |
| Xingguqin   | 7.867                           | 563.049                    | 812                          | 12                                    | 61.443                       | 232966              | 2690                         |

|             |        |         |     |    |        |        |      |
|-------------|--------|---------|-----|----|--------|--------|------|
| Qibie       | 11.313 | 549.376 | 856 | 11 | 62.806 | 232966 | 2690 |
| Kegong1     | 11.125 | 545.575 | 905 | 12 | 62.541 | 232966 | 2690 |
| Kegong2     | 11.454 | 542.048 | 937 | 12 | 63.014 | 232966 | 2690 |
| Pantiange   | 11.750 | 533.189 | 931 | 13 | 61.709 | 228361 | 2718 |
| Caopuo      | 8.742  | 662.368 | 795 | 6  | 78.569 | 114941 | 1475 |
| Yele        | 9.363  | 540.619 | 930 | 6  | 92.354 | 227556 | 2435 |
| Baozigou    | 5.688  | 716.139 | 729 | 4  | 76.994 | 152906 | 1449 |
| Muyangchang | 5.158  | 718.056 | 722 | 3  | 76.935 | 152906 | 1449 |

---

Figure S1. Pearson's correlation tests for bioclimatic variables and UV-B variables.

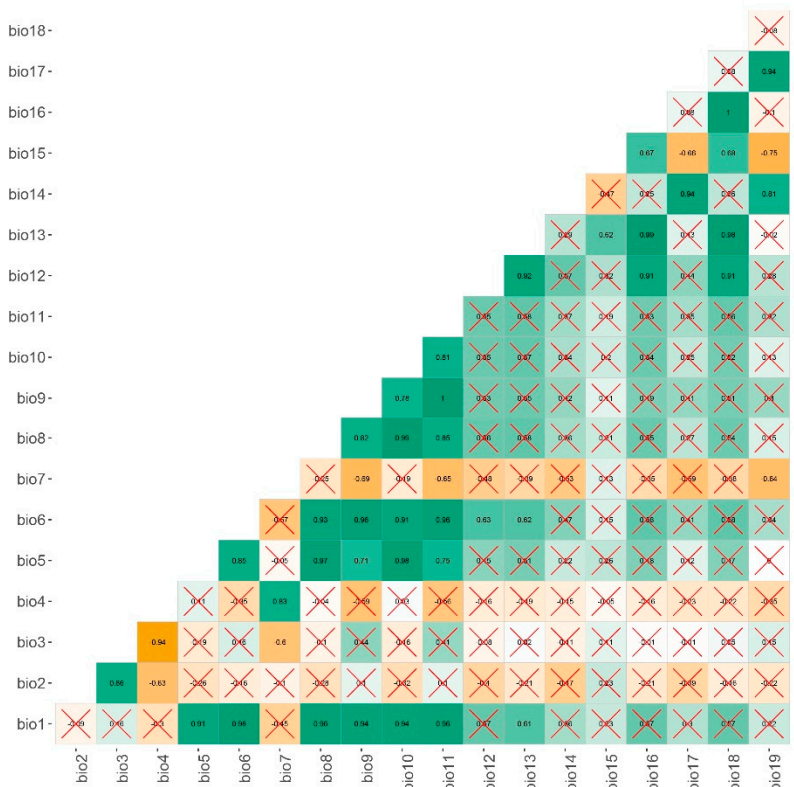

X = non-significant at  $p < 0.05$  (Adjustment: Holm)

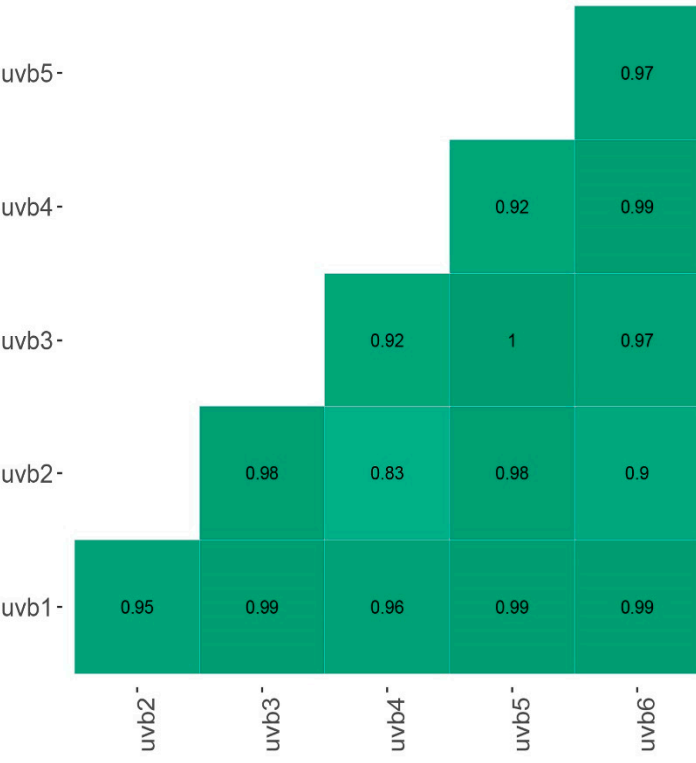

X = non-significant at  $p < 0.05$  (Adjustment: Holm)
